# Supplementary material for: Water-use dynamics of an alien invaded riparian forest within the summer rainfall zone of South Africa
Source: Copernicus journal article supplement (doi:10.5194/hess-2018-227), 2018-05-28
Supplement: Supplementary file [file hess-2018-227-AC1-supplement.pdf]

1 WATER-USE DYNAMICS OF AN ALIEN INVADED RIPARIAN FOREST WITHIN THE  
2 SUMMER RAINFALL ZONE OF SOUTH AFRICA

3  
4 Scott-Shaw Bruce C<sup>1</sup> and Everson Colin S<sup>1,2</sup>

5  
6 <sup>1</sup>Center for Water Resources Research, School of Agricultural, Earth and Environmental Sciences,  
7 University of KwaZulu-Natal, Private Bag X01, Scottsville, Pietermaritzburg 3209, South Africa.

8 <sup>2</sup>Department of Plant and Soil Sciences, University of Pretoria, Private Bag X20, Hatfield, Pretoria  
9 0028, South Africa.

10  
11 **Abstract**

12  
13 In South Africa the invasion of riparian forests by alien trees has the potential to affect the  
14 country's limited water resources. Tree water-use measurements have therefore become an  
15 important component of recent hydrological studies. It is difficult for South African  
16 government initiatives, such as the Working for Water (WfW) alien clearing programme, to  
17 justify alien tree removal and implement rehabilitation unless hydrological benefits are known.  
18 The objective of this study was to investigate the water-use (transpiration rates) of a selection  
19 of introduced and indigenous tree species and quantify the hydrological benefit that could be  
20 achieved through a suitable rehabilitation programme. Consequently water-use within a riparian  
21 forest in the upper Mgeni catchment of KwaZulu-Natal in South Africa was monitored over a  
22 two-year period. The site consisted of an indigenous stand of eastern mistbelt forest that had  
23 been invaded by *Acacia mearnsii*, *Eucalyptus nitens* and *Solanum mauritianum*. The heat ratio  
24 method of the heat pulse velocity sap flow technique and the stem steady state techniques were  
25 used to measure the sap flow of a selection of indigenous and introduced species. The  
26 indigenous trees at New Forest showed clear seasonal trends in the daily sap flow rates varying  
27 from 8 to 25 L·day<sup>-1</sup> in summer (sap flow being directly proportional to tree size). In the winter  
28 periods this was reduced to between 3 and 6 L·day<sup>-1</sup> when limited energy flux was available to  
29 drive the transpiration process. The water-use in the *A. mearnsii* and *E. grandis* trees showed  
30 a slight seasonal trend, with a high flow during the winter months in contrast to the indigenous  
31 species. The water-use in the understorey indicated that multi-stemmed species used up to 12  
32 L·day<sup>-1</sup>. Small alien trees (<30 mm) *A. mearnsii*, and *S. mauritianum* used up to 4 L·day<sup>-1</sup> each.  
33 The combined accumulated daily sap flow per year for the three *A. mearnsii* and *E. grandis*  
34 trees was 6 548 and 7 405 L·year<sup>-1</sup> respectively. In contrast, the indigenous species averaged 2  
35 934 L·year<sup>-1</sup>, clearly demonstrating the higher water-use of the introduced species. After spatial  
36 up-scaling, it was concluded that, at the current state of invasion by 21 %, the stand used 40 %  
37 more water per unit area than if the stand were in a pristine state. If the stand were to be heavily  
38 invaded, at the same stem density of the indigenous forest, a 100 % increase in water-use would  
39 occur over an average rainfall year.

40  
41 **Key Words:** *Indigenous trees, introduced trees, sap flow, transpiration, upscaling*

## 1. Introduction

Parts of South Africa experience up to 87% alien tree invasions (Working for Water, 2011), with most of these being in riparian areas that have readily available water and are difficult to manage. In South Africa there is a limited understanding of the extent to which tree species (particularly those in the riparian area) contribute to total evaporation. As such, it is difficult for government organizations and scientists to justify alien tree removal and rehabilitation, unless a known hydrological benefit can be seen. The deep fertile soils, with high soil moisture contents associated with riparian areas, make them ideal for plant establishment and growth (Everson *et al.*, 2007). In South Africa, these areas are extremely vulnerable to invasion by pioneer plant species, particularly species that have historically been introduced for commercial forestry. In South Africa, there is a widespread belief (which has been supported by numerous studies: Olbrich *et al.*, 1996; Dye *et al.*, 2001; Everson *et al.*, 2007; Dye *et al.*, 2008; Gush and Dye, 2008; Gush and Dye, 2009; Gush and Dye, 2015) in South Africa that indigenous tree species, in contrast to the introduced tree species, use less water and should be planted more widely in land rehabilitation programmes. Little research has been undertaken on the riparian area which excludes water limitations (except in severe drought conditions).

The benefits of healthy riparian zones in providing basic ecosystem services are well known (Askey-Dorin *et al.* 1999; Richardson *et al.*, 2007). These benefits and the impacts of degradation through alien plant invasions were fully described in a study by Scott-Shaw *et al.* (2017) on the water-use of plants in the Mediterranean climate of the Western Cape region of South Africa. Here we summarize the most important aspects relevant to this study.

1. Commercial forestry has been blamed for increasing the green water (water lost by total evaporation) and decreasing the blue water (water in rivers and dams) in areas across South Africa (Jewitt, 2006). For these reasons, invasive alien plants, particularly introduced commercial trees, are considered to be a major threat to water resources and biodiversity.
2. There is a widespread belief in South Africa and globally that indigenous tree species, in contrast to the introduced trees, are water efficient and should be planted more widely in land restoration programmes. This is based on observations that indigenous trees are generally slow growing, and that growth and water-use are broadly linked (Everson *et al.*, 2008; Gush, 2011).
3. At the ecosystem scale, a comprehensive review of numerous internationally published studies indicate that invasive species use up to 189 % more water than indigenous dominated stands, particularly in tropical moist forests (Nosetto *et al.*, 2005; Yopez *et al.*, 2005; Fritzsche *et al.*, 2006). These findings, typically outside of South Africa are limited to mostly herbaceous species with very few recent studies focusing on measurement of introduced trees. In the high rainfall areas of South Africa, invasive alien plants growing in riparian areas are estimated to reduce annual streamflow by  $523 \times 10^6 \text{ m}^3$  with a predicted annual reduction estimated to be as high as  $1\,314 \times 10^6 \text{ m}^3$  if allowed to reach a fully invaded state (Cullis *et al.*, 2007).
4. Management of invaded riparian zones can result in hydrological gains disproportionately greater than the catchment area affected, with up to three times more streamflow yield than upslope areas (Scott and Lesch, 1996; Scott, 1999).
5. For many field and modelling applications, accurate estimates of total evaporation (ET) are required, but are often lacking. Sap flux density measurements give precise information on flow directions as well as spatial and temporal flow distribution (Vandegheuchte and Steppe, 2013). The heat pulse velocity (HPV) method is the most accurate of the available

1 methods when compared against gravimetric methods (Steppe *et al.*, 2010; Vandegehuchte  
2 and Steppe, 2013).

3  
4 While extensive research has been undertaken on the water-use of terrestrial ecosystems, little  
5 is known about riparian tree water-use and growth for both indigenous and introduced tree  
6 species. This gap of knowledge has led to uncertainty and contention over riparian restoration  
7 and rehabilitation techniques. In this research, the water-use was measured for various  
8 indigenous and introduced species that have been identified as economically or ecologically  
9 viable. Results from this study provides substance that may facilitate riparian habitat  
10 rehabilitation. The New Forest site in KwaZulu-Natal, South Africa is part of a Working for  
11 Water (WfW) clearing programme. The government-funded WfW programme clears  
12 catchment areas of invasive alien plants with the aim of restoring hydrological functioning  
13 while also providing poverty relief to local communities through job creation (Turpie *et al.*,  
14 2008). The aim of this study was to quantify the potential hydrological benefit of the conversion  
15 of invaded stands to more pristine stands for forest management practices.

## 16 17 **2. Methods**

18  
19 An overview of the study site, sampling design and equipment implemented to carry out the  
20 study has been provided in this Section. Details on the Heat Pulse Velocity (HPV) technique  
21 has been documented in a previous paper (Scott-Shaw *et al.*, 2017) and will not be repeated  
22 here.

### 23 24 **2.1. The Study Area**

25  
26 The New Forest riparian area is located at latitude 29°28'30" S and longitude 29°52'48" E at  
27 approximately 1760 m above sea level (Figure 1). The riparian area occurs along a tributary to  
28 the upper Umgeni River, within Quaternary Catchment (QC) U20A. The New Forest riparian  
29 area falls within the Eastern Mistbelt forest zone. This forest type in a pristine state is typically  
30 dominated by *Leucosidea sericea*, *Halleria lucida*, *Celtis africana* and *Afrocarpus falcatus*.  
31 Mistbelt forest is a species rich, multi-layered with a dense shrubby understorey. The forests  
32 show a mix of coarse grained, canopy gap/disturbance-driven dynamics and fine-grained,  
33 regeneration characteristics (Mucina and Rutherford, 2006). The surrounding natural areas are  
34 covered by Highland Sourveld (Acocks' 1988) or Drakensberg Foothill Moist Grasslands  
35 (Mucina and Rutherford, 2006). The study site is typical of invasive alien plant (IAP) invasion,  
36 whereby plantations have been grown in traditionally fire dominated grasslands and have  
37 subsequently invaded the surrounding riparian areas. Eastern Mistbelt forests can be  
38 characterised by cool, tall inland forests (Pooley, 2003). The mountain slopes of the area consist  
39 of fractured dolerite dykes and basaltic outpourings (Crowson, 2008). The soils show evidence  
40 of high precipitation and age with shallow unstructured soils occurring on the upper slopes, red  
41 a-pedal soils on the midslope and soils with an underlying G-horizon dominating the low-lying  
42 areas.

43  
44 Approximately 80% of the precipitation occurs in the summer months, which mostly consists  
45 of orographically-induced and squall-line thunderstorms (Schulze, 1982). Interception from  
46 mist makes a large contribution to the seasonal precipitation and determines the distribution of  
47 the Mistbelt forest. The long-term mean annual precipitation is between 941 and 1000 mm with  
48 a distinct dry season from May to August. Average air temperatures range from 25.2 °C in the  
49 summer to 16.9 °C in the winter, with the highest air temperatures occurring on the North-  
50 facing slopes. Cool mountain winds occur at night with warm up-valley winds occurring during

1 the day (Crowson, 2008). Strong berg (westerly) winds are prevalent during August to  
2 September and play a significant role in the spread of fire (Schulze, 1982).

3  
4 New Forest farm is privately owned. The area south of the Umgeni tributary has been planted  
5 with *Acacia mearnsii* and *Pinus patula* since the 1960s. The riparian area has since been heavily  
6 invaded (> 20 %) with *A. mearnsii*, *Eucalyptus nitens* and *Solanum mauritianum*. Riparian  
7 invasive alien tree clearing by WfW has been ongoing in the area.

## 9 **2.2 Sampling Design**

10  
11 Five sites, each representing frequently occurring indigenous and introduced tree species, were  
12 instrumented for water-use monitoring. These trees included a size range of invasive *A.*  
13 *mearnsii* and *E. nitens* trees; a selection of common indigenous trees such as *Gymnosporia*  
14 *buxifolia*, *Celtis africana* and *Searsia pyroides* and a selection of trees growing in the  
15 understory (*S. mauritianum*, *A. mearnsii* and *Buddleja salviifolia*). As the sites were in close  
16 proximity to each other, there were no variations in soil, climate and access to water between  
17 the sites. The leaf area index (LAI) within this stand was 3.1 during the summer months with  
18 a reduction to 2.2 during the winter months due to the presence of deciduous species. There  
19 was little variation in LAI throughout the forest due to a uniform invasion by introduced trees  
20 and the disturbed nature of the indigenous species across the stand.

21  
22 The trees within the riparian forest were in a disturbed state. The overall canopy height of the  
23 indigenous species was low, ranging from 4.1 to 8.3 meters. The invasive species were  
24 significantly taller, ranging from 13.1 to 16.6 meters. The physical characteristics of each  
25 monitored tree is provided in Table 1. There was variability between the stem moisture content  
26 and wood density between species, which can be explained by the different physical  
27 characteristics of the trees measured (variations in sap wood depth and active xylem  
28 concentration). A forest ecology study (Everson *et al.*, 2016) undertaken at New Forest  
29 compiled stem density measurements for re-growth forest, invaded riparian areas and on *S.*  
30 *mauritianum* dominated plots. The findings indicated that in the riparian forest, there was a  
31 density of 1 632 stems·ha<sup>-1</sup> invasive species with 6 090 stems·ha<sup>-1</sup> of indigenous species. In the  
32 *S. mauritianum* plots, there were 1 337 stems·ha<sup>-1</sup> of the invasive species, with 2 600 stems·ha<sup>-1</sup>  
33 of the remaining indigenous species.

## 34 **2.3. Meteorological Station**

35  
36  
37 A meteorological station was established on the 19<sup>th</sup> of September 2012 at New Forest farm in  
38 a nearby natural grassland, 250 m from the tree monitoring sites. Rainfall (TE525, Texas  
39 Electronics Inc., Dallas, Texas, USA), using a tipping bucket rain gauge was measured at a  
40 height of 1.2 meters from the ground. Air temperature and relative humidity (HMP45C, Vaisala  
41 Inc., Helsinki, Finland), solar irradiance (LI-200, LI-COR, Lincoln, Nebraska, USA), net  
42 radiation (NR-Lite, Kipp and Zonen, Delft, The Netherlands) wind speed and direction (Model  
43 03002, R.M. Young, Traverse city, Michigan, USA) were all measured at a height of 2 m from  
44 the ground. These were measured at a 10 s interval and the appropriate statistical outputs were  
45 recorded every hour. A flat and uniform short grassland area which was regularly mowed was  
46 selected to meet the requirement for FAO 56 reference evaporation calculation.

## 47 **2.4 Tree Water-use Measurements**

1 A Heat Pulse Velocity (HPV) system using the heat ratio algorithm (Burgess, 2001) was set up  
2 to monitor long-term sap flow on all of the selected trees over a two-year period. The  
3 instrumentation is described further by Clulow *et al.* (2013) and Scott-Shaw *et al.* (2017) and  
4 included hourly measurements of sap flow heater trace using a pair of type T-thermocouple  
5 probes. Regular maintenance was undertaken to ensure sufficient power and operation of the  
6 equipment. An increment borer was used to take non-destructive samples for sapwood depth,  
7 tree age, wood density and moisture content (described by Marshall, 1958), and allow for up-  
8 scaling of probe measurements to whole tree water-use ( $L \cdot h^{-1}$ ). Non-functional or damaged  
9 xylem (referred to as wounding) around the thermocouples was accounted for using wound  
10 correction coefficients described by Burgess (2001). Tree growth was recorded during each  
11 site visit by measuring diameter at breast height and canopy height using a VL402 hypsometer  
12 (Haglöf, Sweden). Leaf area index using a LAI-2200 (LI-COR, Lincoln, Nebraska, USA) was  
13 measured regularly throughout the stand.

14  
15 The Stem Steady State (SSS) technique, which estimates sap flow by solving a heat balance  
16 for a segment of stem that is supplied with a known amount of heat (Grime and Sinclair, 1999),  
17 was implemented on the smaller trees in the under-storey that were not quantifiable using the  
18 HPV technique. Two Dynamax Flow 32-K systems (Dynamax, Houston, TX, USA) were  
19 installed at New Forest. Each of these systems was powered by a 12V 100Ah battery, and  
20 consisted of a CR1000 data logger (Campbell Scientific Inc.) and an AM16/32B multiplexer.  
21 A voltage control unit regulated the voltage output depending on the number of collars and the  
22 size of the collars. The gauge's insulating sheath (referred to as a 'collar') contains a system of  
23 thermocouples that measure temperature gradients associated with conductive heat losses  
24 vertically (up and down the stem), and radially through the sheath (Allen and Grime, 1994). A  
25 foam insulation and weather shield were installed around the stem in order to sufficiently  
26 minimize extraneous thermal gradients that could influence the heated section of stem (Smith  
27 and Allen, 1996). The conduction of heat vertically upwards and downwards was calculated  
28 by measuring voltages which corresponded to the temperature difference between two points  
29 above and below the heater (Savage *et al.*, 2000). The radial heat was calculated by measuring  
30 the temperature difference of the insulated layer surrounding the heater (Savage *et al.*, 2000).  
31 Finally, the voltage applied to the heater was measured. These measurements allowed the  
32 energy flux ( $J \cdot s^{-1}$ ) to be calculated (Savage *et al.*, 2000).

## 33 34 **2.5 Soil Water Measurements**

35  
36 Hourly volumetric soil water contents were recorded at sites 1 and 2 within the riparian forest  
37 with three time domain reflectometry (TDR) probes (Campbell Scientific Inc, CS 615) installed  
38 horizontally at each site. The probes were installed at depths of 0.1, 0.3 and 0.5 m below the  
39 litter layer, due to shallow soils at the site. A thick litter layer was observed throughout the site  
40 consisting of mostly indigenous leaves and large broken branches from cattle and climatic  
41 disturbances. The hourly volumetric water content measurements provided an understanding  
42 of the responses of trees to rainfall events, or stressed conditions. Additional soil samples were  
43 taken to determine the distribution of roots, soil bulk density and soil water content.

## 44 45 **2.6 Up-scaling Tree Water-Use**

46  
47 Although the riparian stand had a heterogeneous composition, the availability of detailed stem  
48 density measurements (Everson *et al.*, 2016) allowed for a methodology to be followed based  
49 on relevant up-scaling studies (Ford *et al.*, 2007; Miller *et al.*, 2007):  
50

- 1 • Medoid (representative of the population) trees were selected for sap flow measurement
- 2 - most commonly occurring indigenous species (canopy and understory)
- 3 - most commonly occurring introduced species (canopy and understory)
- 4 - a range of size classes for each species
- 5 • A species density analysis was undertaken (species and diameter (>50 mm) in multiple
- 6 400 m<sup>2</sup> plots).
- 7 • A relationship was derived between the measured whole tree water-use (using HPV and
- 8 SSS) and each representative size class and species class identified in the density
- 9 measurements. This allowed for the estimation of the stand water flux ( $Q_{\text{stand}}$ ).
- 10 • The  $Q_{\text{stand}}$  was divided by the plot area (400 m<sup>2</sup>) to allow for the estimation of water-use
- 11 per unit area.

12  
13 Techniques that measure total evaporation over a spatial area are usually ideal for up-scaling  
14 sap-flow measurements. However, at sites with limited aerodynamic fetch common in riparian  
15 areas, techniques such as eddy covariance may not always be used in the up-scaling process.  
16 With the availability of detailed stem density data, up-scaling whole-tree measurements to  
17 stand-level measurements can be done. However, limitations exist regarding the equipment  
18 available to maximize replications.

### 19 20 **3. Results**

#### 21 22 **3.1. Weather Conditions during the Study Period**

23  
24 The historical mean annual precipitation (MAP) for the New Forest area is 941 mm. During  
25 the two-year monitoring period the area received 1164 and 1110 mm·a<sup>-1</sup> for 2013 and 2014  
26 respectively. The rainfall distribution had a strong seasonal trend throughout the two years with  
27 an exceptionally high amount of 120 mm·day<sup>-1</sup> in November 2014 (Figure 2). The daily solar  
28 radiation peaked at 39 MJ·m<sup>-2</sup> following the same seasonal trend to that of the daily air average  
29 temperatures.

30  
31 During periods of high solar radiation, the water vapour pressure deficit was high and  
32 correlated to peaks in transpiration rates. An average daily air temperature of 18.4 °C was  
33 recorded at New Forest in the summer months. During these months, daily maximum air  
34 temperatures occasionally exceeded 30 °C. During the winter months, the air temperatures  
35 averaged 11.7 °C due to numerous days with low solar radiation. Periods of low solar radiation  
36 correspond to overcast and/or rainfall periods and would likely result in little to no transpiration  
37 occurring. The daily reference total evaporation ( $ET_0$ ), derived from data captured on site,  
38 averaged approximately 1 mm·day<sup>-1</sup> in the winter period to 5 mm·day<sup>-1</sup> during the summer  
39 period. The monthly climate data illustrates the seasonal rainfall and air temperature trend  
40 (Figure 3). The seasonal distribution of rainfall is important as it is during these periods of  
41 water scarcity where the vegetative water-use becomes significant.

#### 42 43 **3.2. Tree Water-Use**

44  
45 The radial heat pulse velocity of a *G. buxifolia* was measured over a short summer period  
46 (Figure 4). The velocity of water moving through the tree was highest (up to 20 cm·h<sup>-1</sup>) nearest  
47 to the bark. Probes inserted deeper in the tree (> 15 mm) measured very little flow suggesting  
48 that there was less active xylem at these depths, resulting in a small sapwood area. During the  
49 winter period the radial heat pulse velocity of *A. mearnsii* had maximal flow 25 mm below the

1 bark (Figure 5). There was still flow occurring at a depth of 35 mm, indicating a much bigger  
2 sapwood area than that of the indigenous tree. Furthermore, the sap velocity was high, ( $> 20$   
3  $\text{cm}\cdot\text{h}^{-1}$ ) even during the dry winter period. These findings also indicated that correct probe  
4 placement is essential in accurately representing the entire sapwood area of each tree.

5  
6 Individual whole tree water-use showed a clear seasonal water-use trend for the semi-  
7 deciduous and deciduous indigenous species (Figure 6). This was attributed to fewer daylight  
8 hours and less heat units during the winter months resulting in reduced available energy;  
9 therefore limiting the transpiration process. The daily water-use of *S. pyroides* averaged 8  
10  $\text{L}\cdot\text{day}^{-1}$  in summer compared to 3  $\text{L}\cdot\text{day}^{-1}$  in winter, resulting in an accumulated total water-use  
11 of 1639  $\text{L}\cdot\text{year}^{-1}$  (Figure 6 a). The deciduous *C. africana* used large amounts of water in the  
12 summer, with an average of 25  $\text{L}\cdot\text{day}^{-1}$ . In the winter periods, after leaf fall, this species used  
13 no water, resulting in a reduction of the total annual water-use (4307  $\text{L}\cdot\text{year}^{-1}$ ). In contrast, *G.*  
14 *buxifolia* used approximately 15  $\text{L}\cdot\text{day}^{-1}$  in summer compared to 6  $\text{L}\cdot\text{day}^{-1}$  in winter, resulting  
15 in an accumulated total water-use of 3870  $\text{L}\cdot\text{year}^{-1}$  over the same period (Figure 6 a, b, c).

16  
17 The introduced *A. mearnsii* of a similar stem diameter showed little seasonal variation (Figure  
18 6 d). This tree averaged 22  $\text{L}\cdot\text{day}^{-1}$  during summer periods and 14  $\text{L}\cdot\text{day}^{-1}$  during winter periods  
19 yielding a total of 5743  $\text{L}\cdot\text{year}^{-1}$ , higher than that of the indigenous species and comparable to  
20 other large introduced species measured throughout South Africa (Gush *et al.*, 2015).

21  
22 The water-use of the multi-stemmed *B. salviifolia*, measured using the SSS technique, had the  
23 highest daily water-use (up to 12  $\text{L}\cdot\text{day}^{-1}$ ) (Figure 7). This tree, although short, had the greatest  
24 canopy area due to its lateral growth patterns with its numerous stems. In comparison, the  
25 smaller *A. mearnsii* used considerably less water, with a peak of 4  $\text{L}\cdot\text{day}^{-1}$ . The three *S.*  
26 *mauritanum* trees were highly variable, ranging from very low flows (0.4  $\text{L}\cdot\text{day}^{-1}$ ) to in excess  
27 of 4  $\text{L}\cdot\text{day}^{-1}$ . Although these values are small in comparison to the larger trees measured, it  
28 does show the importance of the understorey in-stand measurements. These trees, particularly  
29 the *S. mauritanum*, have a high density suggesting that the cumulative water-use of these trees  
30 is important when scaling up to the total forest water-use.

31  
32 The daily summer water-use of indigenous trees at site 1 (Table 2) showed low water-use with  
33 an average of between 9 and 15  $\text{L}\cdot\text{day}^{-1}$  in the summer months. Likewise, the indigenous trees  
34 at site 3 were low water-users. Despite being deciduous, the *C. africana* used the most water  
35 of all the indigenous trees measured. This tree was the tallest of the indigenous trees measured  
36 and was not shaded by other species. Given that this species is deciduous, it is important to  
37 note that this tree uses a minimal amount of water in the winter when water resources are  
38 limited. The indigenous *B. salviifolia*, measured using the SSS technique had a similar water-  
39 use to that of the lower climax species.

40 The daily summer water-use of the *A. mearnsii* and the *E. grandis* were high in comparison to  
41 the indigenous species. These trees used between 18 and 27  $\text{L}\cdot\text{day}^{-1}$  in the summer months and  
42 between 14 and 17  $\text{L}\cdot\text{day}^{-1}$  in the winter months. On average, the introduced species used 2.4  
43 times more water than the average indigenous species. However, this is a direct comparison  
44 and would differ to up-scaled comparisons due to the different stem densities of each species.

### 45 **3.3. Soil Profile and Water Content**

46  
47  
48 The volumetric soil water content (VWC) measured at New Forest was highly responsive to  
49 rainfall events (Figure 8 and 9). During the wet summer season, the VWC at the indigenous  
50 site 1 (Figure 6) ranged from 27 % in the upper horizon to 35 % in the lower horizon. This

1 indicated a higher clay content in the lower horizon. Towards the dry season, as the vegetation  
2 continues to use water, the VWC was depleted to 10 % in the upper horizons. At the introduced  
3 site 2, the soils were uniform throughout the horizons. During the summer periods, the profile  
4 soil water averaged 27 % whereas it depleted to 9 % or 11 mm of water per 100 mm depth of  
5 soil during the dry periods.

6  
7 The soils had a dry bulk density ( $\rho_b$ ) of  $1.22 \text{ g}\cdot\text{cm}^{-3}$ , a particle density ( $\rho_{\text{particle}}$ ) of  $2.54 \text{ g}\cdot\text{cm}^{-3}$   
8 and a porosity 0.52, typically characteristic of sandy-loam soils. Introduced forestry species are  
9 known to have deep rooting systems, with observations of greater than 8 m in South Africa  
10 (Everson *et al.*, 2006). This suggested that during dry periods, this stand can access water from  
11 deeper layers in the soil profile. However, given the shallow depth of all the soils and the close  
12 proximity of the sites to the stream, it is clear that the vegetation in this area was not limited  
13 by water availability.

14  
15 The VWC at both sites did not respond significantly to rainfall events under  $6 \text{ mm}\cdot\text{h}^{-1}$  unless  
16 during consecutive events. Based on seasonally high transpiration rates we conclude that deep  
17 rooted plants in the riparian zone at the site are energy flux limited rather than moisture limited.

### 18 19 **3.4. Upscaling Tree Water-Use**

20  
21 The results obtained from both the HPV and SSS techniques were used to determine an actual  
22 annual water-use per unit area of the invaded mistbelt forest. Two hypothetical scenarios, a  
23 pristine forest and a heavily invaded forest, were also tested. Using the stem density per size  
24 class taken from ecological research completed in the area (Everson *et al.*, 2016), stands of  
25 forest were compared. As the forest did not have a closed canopy, understorey trees were  
26 numerous as more photosynthetically active radiation (PAR) was available throughout the  
27 stand. The water-use for a two-year average of the riparian forest in its current state (21 %  
28 invaded) was upscaled for all species and size classes. The total stand water-use was  
29 approximately  $3.3 \text{ ML}\cdot\text{ha}^{-1}\cdot\text{a}^{-1}$  ( $330 \text{ mm}\cdot\text{a}^{-1}$ ). This was 29 % of the average annual precipitation  
30 recorded during the monitoring period ( $1030 \text{ mm}\cdot\text{a}^{-1}$ ).

31  
32 Two hypothetical scenarios were applied using the existing size class distribution for each  
33 species class and extrapolated this based on an assumed invasion level. Assuming that the site  
34 was rehabilitated to a more pristine state, using stem density for non-invaded areas, the  
35 upscaled indigenous stand would use  $2.39 \text{ ML}\cdot\text{ha}^{-1}\cdot\text{a}^{-1}$  ( $239 \text{ mm}\cdot\text{a}^{-1}$ ). This would be 21 % of  
36 the average annual precipitation. If the stand were to degrade further and become heavily  
37 invaded, the upscaled invaded stand would use  $4.88 \text{ ML}\cdot\text{ha}^{-1}\cdot\text{a}^{-1}$  ( $488 \text{ mm}\cdot\text{a}^{-1}$ ). This would be  
38 43 % of the average annual precipitation. Based on these results we conclude that the invaded  
39 stand uses 40 % more water per unit area annually than a pristine indigenous stand. If the stand  
40 were to become heavily invaded, a two-fold increase in water-use would occur (104 %  
41 increase) with concomitant impacts on the water balance (streamflow). The inter- and intra-  
42 species water-use variations, particularly within the heterogeneous indigenous stand, highlight  
43 the importance of good replications of a representative sample tree species and size classes.  
44 The results also show that it is important to highlight the slope position, physiological  
45 characteristics and climatic variations occurring during measurement periods.

46  
47 Due to a severe drought in this area, subsequent to the measurement period, these results are  
48 more likely to provide substance to land managers and decision makers, indicating the  
49 hydrological benefit of restoration and rehabilitation activities.



#### 4. Discussion and Conclusion

In South Africa, it has been well documented that introduced commercial tree species, in contrast to indigenous tree species, use more water and, if removed, would result in a net hydrological gain (Olbrich *et al.*, 1996; Dye *et al.*, 2001; Everson *et al.*, 2007; Dye *et al.*, 2008; Gush and Dye, 2008; Gush and Dye, 2009; Gush and Dye, 2015). The greater sapwood area in introduced species, as well as their fast establishment, tree density and rapid growth, results in a greater transpiration rate than indigenous species per unit area. The HPV and SSS techniques have been used, both locally and internationally, on numerous vegetation types. The accuracy of these measurements has been validated using gravimetric methods (Burgess *et al.*, 2001; Granier and Loustau, 2001; O’Grady *et al.*, 2006; Steppe *et al.*, 2010; Vandegehuchte and Steppe, 2013; Uddin and Smith, 2014; Forster, 2017). In South Africa, the HPV technique has been shown to provide accurate estimates of sap flow in both introduced tree species such as *Acacia mearnsii*, *Pinus patula* and *Eucalyptus nitens*, and indigenous tree species such as *Rapanea melanophloeos*, *Podocarpus henkelii* and *Celtis africana* (Smith and Allen, 1996; Dye *et al.*, 2001; Everson *et al.*, 2007; Dye *et al.*, 2008). There is consensus in the literature that rehabilitation or restoration measures can result in maximising benefits such as goods and services, while minimising water consumption (Gush, 2011).

A recent study showed that introduced stands could use up to six times more water than indigenous species in the riparian area (Scott-Shaw *et al.*, 2017). However, this difference was largely related to stem density at a site where high winter rainfall and deep sandy soils were conducive to a high density mature introduced stand. The stand at New Forest, which was highly disturbed and was in a constant state of recovery, did not have a high stem density of mature trees in its current state. The measurements undertaken at this site have allowed for an accurate direct comparison of indigenous and introduced tree water-use. Additionally, the measurements of trees growing in the understorey have provided interesting findings, indicating significant water-use in the sub-canopy layer. The results showed that individual tree water-use is largely inter-species specific. As the introduced species remain active during the dry winter periods, their cumulative water-use is significantly greater than that of the indigenous species. Small trees (< 30 mm) in the understorey can use up to 2000 L·year<sup>-1</sup>, which is important for up-scaling to stand water-use. Up-scaled comparisons showed that due to the invasion by *A. mearnsii* and *E. grandis* (21 %), the stand water-use has increased by 40 %. This is an important finding as it provides clear evidence to justify the hydrological benefit of clearing programmes. If the stand were to be completely invaded, at the same stem density as the indigenous stand, the water-use would double for this particular area. The findings from the understorey suggest that the water-use from this zone should not be excluded from future studies, especially where there is no canopy closure. The promotion of indigenous deciduous trees for rehabilitation or clearing programmes may be important as there would be no transpiration during periods when water resources are limited.

Spatial estimates of evapotranspiration are required but are difficult to obtain in remote areas with limited aerodynamic reach. Remote sensing could be one area where this could be useful given appropriate validation. However the nature of the “thin” riparian strip will require finer scales than provided by most remote sensing products used for evaporation modelling (e.g. Landsat 8). The use of drones could provide the best option for these narrow riparian strips in the subsequent studies. Management dynamics are important in these environments. There is potential for these data to be used in a modelling framework with specific inputs for invaded mixed riparian forests. This would provide a suitable land management tool.

1  
2  
3  
4  
5  
6  
7  
8  
9  
10

*Acknowledgements. The research presented in this paper forms part of an unsolicited research project (Rehabilitation of alien invaded riparian zones and catchments using indigenous trees: an assessment of indigenous tree water-use) that was initiated by the Water Research Commission (WRC) of South Africa. The project was managed and funded by the WRC, with co-funding and support provided by the Department of Economic Development, Tourism and Environmental Affairs (EDTEA). The land owner, Alfie Messenger of New Forest farm is acknowledged for allowing field work to be conducted on their property. Assistance in the field by Dr. Alistair Clulow, Allister Starke and Sipiwe Mfeka is much appreciated.*

## 5. References

- Allen, S.J., and Grime, V.L.: Measurements of transpiration from savannah shrubs using sap flow gauges. *Agricultural and Forest Meteorology*. 75: 23-41, 1994.
- Askey-Dorin, M., Petit, N., Robins, L., and McDonald, D.: The role of vegetation in riparian management. In: *Riparian Land Management Technical Guidelines*. Vol. 1. Principles of Sound Management. Eds. S. Lovett and P. Price. LWRRDC Canberra. pp. 97-120, 1999.
- Baruch, Z., and Fernandez, D.S.: Water relations of native and introduced C4 grasses in a neotropical savanna. *Oecologia* 96:179–185, 1993.
- Burgess, S.O., Adams, M.A., Turner, N.C., Beverly, C.R, Ong, C.K., Khan, A.A.H., and Bleby, T.M.: An improved heat pulse method to measure low and reverse rates of sap flow in woody plants, *Tree Physiol.*, 21, 589-598, 2001.
- Cavaleri, M.A., and Sack, L.: Comparative water-use of native and invasive plants at multiple scales: a global meta-analysis. *Ecology*, 91(9), 2010, pp. 2705–2715, 2010.
- Cleverly, J.R., Smith, S.D., Sala, A., and Devitt, D.A.: Invasive capacity of *Tamarix ramosissima* in a Mojave Desert floodplain: the role of drought. *Oecologia* 111:12–18, 1997.
- Clulow, A.D., Everson, C.S., Price, J.S., Jewitt, G.P.W., and Scott-Shaw, B.C.: Water-use dynamics of a peat swamp forest and dune forest in Maputaland, South Africa, *Hydrol. Earth Syst. Sci.*, 17, 2053-2067, 2013.
- Crowson, J.: Ezemvelo KZN Wildlife. 2008. *Integrated Management Plan: uMngeni Veli Nature Reserve, South Africa*. Ezemvelo KZN Wildlife, Pietermaritzburg, 67, 2008.
- Cullis, J., Görgens, A., and Marais, C.: A strategic study of the impact of invasive alien vegetation in the mountain catchment areas and riparian zones of South Africa on total surface water yield. *Water SA* 33 (1) 35-42, 2007.
- Dixon, P., Hilton, M., and Bannister, P.: *Desmoschoenus spiralis* displacement by *Ammophila arenaria*: the role of drought. *New Zealand Journal of Ecology* 28:207–213, 2004.
- Dye, P.J.: Modelling growth and water-use in four *Pinus patula* stands with the 3-PG process-based model, *Southern African Forestry Journal*, No. 191(53-63), 2001.
- Dye, P.J., Gush, M.B., Everson, C.S., Jarman, C., Clulow, A., Mengistu, M., Geldenhuys, C. J., Wise, R., Scholes, R.J., Archibald, S., and Savage, M.J.: Water-use in relation to biomass of indigenous tree species in woodland, forest and/or plantation conditions, *Water Research Commission Report No. 361/08*, ISBN 978-1-77005-744-9, Water Research Commission, Pretoria, South Africa, 156 pp., 2008.
- Everson, C.S., Gush, M.B., Moodley, M., Jarman, C., Govender, M., and Dye, P.J.: Effective management of the riparian zone vegetation to significantly reduce the cost of catchment management and enable greater productivity of land resources, *Water Research Commission Report No. 1284/1/07*, ISBN 978-1-77005-613-8, Pretoria, South Africa, 92 pp., 2007.

- 1 Everson, C., Scott-Shaw, B.J., Starke, A.P., Geldenhuys, C.J., Atsame-Edda, A., Shutte, S.:  
2 Rehabilitation of Alien Invaded Riparian Zones and Catchments Using Indigenous Tree: An  
3 Assessment of Indigenous Tree Water-use: K5/2081. Water Research Commission Report No.  
4 2081/1/16. Pretoria, South Africa.  
5
- 6 Ford, C.R., McGuire, M.A., Mitchell, R.J. and Teskey, R.O.: Assessing variation in the radial  
7 profile of sap flux density in Pinus species and its effect on daily water-use. *Tree Physiol.* 24,  
8 241-249, 2004.  
9
- 10 Fritzsche, F., Abate, A., Fetene, M., Beck, E., Weise, S., and Guggenberger, G.: Soil-plant  
11 hydrology of indigenous and exotic trees in an Ethiopian montane forest. *Tree Physiology*  
12 26:1043–1054, 2006.  
13
- 14 Geldenhuys, C.J.: National forest types of South Africa: SA Forestry Magazine, Department  
15 of Agriculture, Forestry and Fisheries, Pretoria, South Africa, 2010.  
16
- 17 Granier, A., Loustau, D. and Bréda, N.: A Generic Model of Forest Canopy Conductance  
18 Dependent on Climate, Soil Water Availability and Leaf Area Index. *Annals of Forest*  
19 *Science.* 57, 755-765, 2001.  
20
- 21 Grime, V.L., and Sinclair, F.L: Sources of error in stem heat balance sap flow measurements.  
22 *Agricultural and Forest Meteorology.* 94: 103-121, 1999.  
23
- 24 Gush, M.B. and Dye, P.J.: Water-use Measurements of Selected Woodland Tree Species within  
25 the Kruger National Park. CSIR, % Agrometeorology, School of Environmental Sciences,  
26 University of KwaZulu-Natal, Scottsville, South Africa, 2008.  
27
- 28 Gush, M.B. and Dye, P.J.: Water-Use Efficiency Within a Selection of Indigenous and Exotic  
29 Tree Species in South Africa as Determined Using Sap Flow and Biomass Measurements.  
30 CSIR, % Agrometeorology, School of Environmental Sciences, University of KwaZulu-Natal,  
31 Scottsville, South Africa, 2009.  
32
- 33 Gush, M.B.: Water-use, growth and water-use efficiency of indigenous tree species in a range  
34 of forest and woodland systems in South Africa. PhD dissertation, Department of Botany,  
35 University of Cape Town, 2011.  
36
- 37 Gush, M. B., de Lange, W.J., Dye, P.J. and Geldenhuys, C.J.: Water-use and Socio-  
38 Economic Benefit of the Biomass of Indigenous Trees Volume 1: Research Report, 2015.  
39
- 40 Jarman, C., Everson, C.S., Savage, M.J., Clulow, A.D., Walker, S. and Gush, M.B.: Refining  
41 tools for evaporation monitoring in support of water resource management. Water Research  
42 Commission Report No. 1567/1/08. Water Research Commission, Pretoria, RSA, 2008.  
43
- 44 Jewitt, G.: Integrating blue and green water flows for water resources management and  
45 planning, *Physics and Chemistry of the Earth, Parts A/B/C* 31(15–16), 753-762, 2006.  
46
- 47 Joshi, C., de Leeuw, J., and van Duren, I.C.: Remote sensing and GIS applications for mapping  
48 and spatial modelling of invasive species. Pages 669-677. ISPRS, Istanbul, Turkey, 2004.  
49

- 1 Kagawa, A., Sack, L., Duarte, K. and James, S.A.: Hawaiian native forest conserves water  
2 relative to timber plantation: Species and stand traits influence water-use. *Ecological*  
3 *Applications* 19:1429–1443, 2009.  
4
- 5 Le Maitre, D.C., van Wilgen, B.W., Chapman, R.A., and McKelly, D.H.: Invasive plants and  
6 water resources in the Western Cape Province, South Africa: modelling the consequences of a  
7 lack of management. *Journal of Applied Ecology* 33, 161–172, 1996.  
8
- 9 Marshall, D.C.: Measurement of sap flow in conifers by heat transport. *Plant Physiology*, 33,  
10 385-396, 1958.  
11
- 12 Miller, G.R., Xingyuan, C., Yoram, R., and Baldocchi, D.D.: A new technique for upscaling  
13 sap flow transpiration measurements to stand or land use scale fluxes. *Civil and Environmental*  
14 *Engineering*, University of California – Berkeley, 2007.  
15
- 16 Mucina, L., and Rutherford, M.C.: The vegetation of South Africa, Lesotho and Swaziland.  
17 *Strelitzia* 19. South African National Biodiversity Institute, Pretoria, 2011.  
18
- 19 Nagler, P.L., Glenn, E.P. and Thompson, T.L.: Comparison of transpiration rates among  
20 saltcedar, cottonwood and willow trees by sap flow and canopy temperature methods.  
21 *Agricultural and Forest Meteorology* 116:73–89, 2003.  
22
- 23 Nosoetto, M. D., Jobbagy, E.G. and Paruelo, J.M.: Landuse change and water losses: the case  
24 of grassland afforestation across a soil textural gradient in central Argentina. *Global Change*  
25 *Biology* 11:1101–1117, 2005.  
26
- 27 O'Grady, A.P., Cook, P.G., Howe, P. and Werren, G.: An assessment of groundwater-use by  
28 dominant tree species in remnant vegetation communities, Pioneer Valley, Queensland. *Aust.*  
29 *J. Bot.*, 2006.  
30
- 31 Olbrich, B., Olbrich, K., Dye, P.J. and Soko, S. A.: Year-Long Comparison of Water-use  
32 Efficiency of Stressed and Non- Stressed *E. grandis* and *P. patula*: Findings and Management  
33 Recommendations. CSIR report FOR-DEA 958. CSIR, Pretoria, South Africa, 1996.  
34
- 35 Pratt, R.B., and Black, R.A.: Do invasive trees have a hydraulic advantage over native trees?  
36 *Biological Invasions* 8: 1331–1341, 2006.  
37
- 38 Reid, A.M.L., Morin, P.O., Downey, K., French, K.O., and Virtue, J.G.: Does invasive plant  
39 management aid the restoration of natural ecosystems? *Biological Conservation* 142:2342-  
40 2349, 2009.  
41
- 42 Richardson, D.M., Rouget, M., Ralston, S.J., Cowling, R.M., van Rensburg, B.J., and Thuiller,  
43 W.: Species richness of alien plants in South Africa: Environmental correlates and the  
44 relationship with indigenous plant species richness. *Ecoscience*. 12, 391-402, 2005.  
45
- 46 Savage M.J., Everson, C.S., Odhiambo, G.O., Mengistu, M.G. and Jarmain, C.: Theory and  
47 practice of evaporation measurement, with a special focus on SLS as an operational tool for  
48 the estimation of spatially-averaged evaporation, Water Research Commission Report No.  
49 1335/1/04. Water Research Commission, Pretoria, RSA, 2004.  
50

- 1 Savage, M.J., Graham, A.N.D., and Lightbody, K.E.: An investigation of the stem steady  
2 state heat energy balance technique in determining water-use by trees. Water Research  
3 Commission. 348: 1-168, 2000.  
4
- 5 Schulze, R.E.: Mapping mean monthly temperature distributions for Natal by trend surface  
6 analysis. South African Journal of Science, 78, 246 – 248, 1982.  
7
- 8 Scott, D.F.: Managing riparian zone vegetation to sustain streamflow: Results of paired  
9 catchment experiments in South Africa. Canadian Journal of Forest Research. 29(7): 1149-  
10 1157 1999.  
11
- 12 Scott, D.F., and Lesch, W.: The effects of riparian clearing and clearfelling of an indigenous  
13 forest on streamflow, stormflow and water quality. S. Afr. For. J. 175: 1-14, 1996.  
14
- 15 Smith, D., and Allen, S.: Measurement of sap flow in plant stems. Journal of Experimental  
16 Botany, 47(12), 1833. <http://dx.doi.org/10.1093/jxb/47.12.1833>, 1996.  
17
- 18 Solarz, W.: Biological invasions as a threat for nature. Progress in Plant Protection 47:128-133,  
19 2007.  
20
- 21 Steppe, K., De Pauw, D.J.W., Doody, T.M., Teskey, R.O.: A comparison of sap flux density  
22 using thermal dissipation, heat pulse velocity and heat field deformation methods. Laboratory  
23 of Plant Ecology, Department of Applied Ecology and Environmental Biology, Faculty of  
24 Bioscience Engineering, Ghent University, Coupure links 653, 9000 Gent, Belgium, 2010.  
25
- 26 Swanson, R. H., and Whitfield, D. W. A.: A Numerical Analysis of Heat Pulse Velocity Theory  
27 and Practice, J. Exp. Bot., 32, 221-239, 1981.  
28
- 29 Tabacchi, E., Lambs, L., Guilloy, G., Planty-Tabacchi, A.M., Muller, E., and de´Camps, H.:  
30 Impacts of riparian vegetation on hydrological processes. Hydrological Processes. 14, 2959–  
31 2976, 2000.  
32
- 33 Turpie, J.K, Marais, C. and Blignaut, J.N.: The working for water programme: Evolution of a  
34 payments for ecosystem services mechanism that addresses both poverty and ecosystem service  
35 delivery in South Africa. Ecol. Econ. 65 (4) 788-798, 2008.  
36
- 37 Vandegehuchte, M.W. and Steppe, K.: Sap-flux density measurement methods: working  
38 principles and applicability. Laboratory of Plant Ecology, Faculty of Bioscience Engineering,  
39 Ghent University, Coupure links 653, 9000 Gent, Belgium, 2013.  
40
- 41 Van Wilgen, B.W., Davies, S.J. and Richardson, D.M.: Invasion science for society: A decade  
42 of contributions from the Centre for Invasion Biology. S Afr J Sci.;110(7/8), Art. #a0074, 12  
43 pages, 2014.  
44
- 45 Wal, R.V.D., Truscott, A.M., Pearce, I.S.K., Cole, L., Harris, M.P., and Wanless, S.: Multiple  
46 anthropogenic changes cause biodiversity loss through plant invasion. Global Change Biology  
47 14:1428-1436, 2008.  
48
- 49 Yepez, E. A., Huxman, T.E., Ignace, D.D., English, N.B., Weltzin, J.F., Castellanos, A.E. and  
50 Williams, D.G.: Dynamics of transpiration and evaporation following a moisture pulse in

- 1 semiarid grassland: a chamber-based isotope method for partitioning flux components.
- 2 Agricultural and Forest Meteorology 132:359–376, 2005.
- 3

1

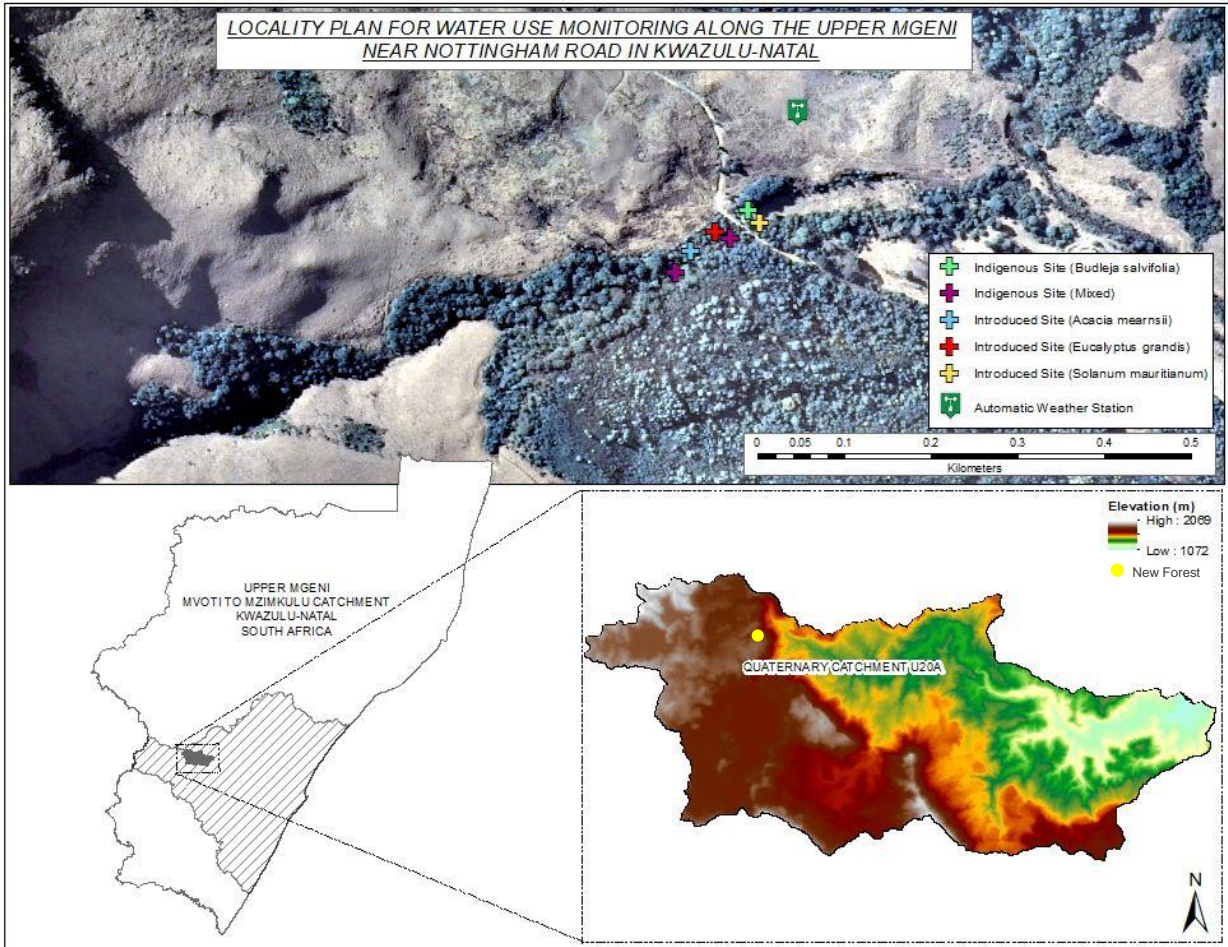

2  
3  
4

Figure 1. Location of New Forest farm research area within KwaZulu-Natal, South Africa.



1  
2  
3

Table 1. Tree physiology and specific data required for the calculation of sap flow and up-scaling.

| Indigenous Forest (Site 1)       | Diameter (mm)   | Size Class | Growth Stage | Moisture fraction | Average wounding (mm) | Wood density (g·cm <sup>-3</sup> ) | Representative stem density (stems·ha <sup>-1</sup> ) |
|----------------------------------|-----------------|------------|--------------|-------------------|-----------------------|------------------------------------|-------------------------------------------------------|
| * <i>Searsia pyroides</i>        | 98              | Small      | S            | 0.41              | 3.1                   | 0.60                               |                                                       |
| * <i>Gymnosporia buxifolia</i>   | 114             | Small      | C            | 0.44              | 2.6                   | 0.65                               | 6 090                                                 |
| * <i>Gymnosporia buxifolia</i>   | 58              | Small      | C            | 0.44              | 2.6                   | 0.66                               |                                                       |
| Introduced/Alien Forest (Site 2) |                 |            |              |                   |                       |                                    |                                                       |
| * <i>Acacia mearnsii</i>         | 131             | Medium     | S            | 0.48              | 3.0                   | 0.69                               | 1 632                                                 |
| * <i>Acacia mearnsii</i>         | 166             | Medium     | S            | 0.47              | 3.0                   | 0.69                               |                                                       |
| Indigenous Forest (Site 3)       |                 |            |              |                   |                       |                                    |                                                       |
| * <i>Celtis africana</i>         | 102             | Medium     | S            | 0.49              | 4.8                   | 0.68                               |                                                       |
| * <i>Kiggerlaria africana</i>    | 50              | Medium     | P            | 0.46              | 3.1                   | 0.69                               | 6 090                                                 |
| * <i>Leucosidea sericea</i>      | 212             | Large      | C            | 0.47              | 2.8                   | 0.64                               |                                                       |
| Introduced/Alien Forest (Site 4) |                 |            |              |                   |                       |                                    |                                                       |
| * <i>Eucalyptus nitens</i>       | 165             | Small      | S            | 0.51              | 3.8                   | 0.71                               | 1 632                                                 |
| * <i>Eucalyptus nitens</i>       | 96              | Small      | P            | 0.51              | 3.9                   | 0.71                               |                                                       |
| Mixed understorey (Site 5)       |                 |            |              |                   |                       |                                    |                                                       |
| # <i>Buddleja salvifolia</i>     | 28 <sup>+</sup> | Small      | S            | N/A               | N/A                   | N/A                                | 2 600                                                 |
| # <i>Solanum mauritianum</i>     | 25              | Small      | P            | N/A               | N/A                   | N/A                                | -                                                     |
| # <i>Solanum mauritianum</i>     | 10              | Small      | P            | N/A               | N/A                   | N/A                                | -                                                     |
| # <i>Solanum mauritianum</i>     | 19.1            | Small      | P            | N/A               | N/A                   | N/A                                | 1 337                                                 |
| # <i>Solanum mauritianum</i>     | 26.7            | Small      | P            | N/A               | N/A                   | N/A                                | -                                                     |
| # <i>Acacia mearnsii</i>         | 25.6            | Small      | P            | N/A               | N/A                   | N/A                                | -                                                     |

4 \*Note: \* indicates that the HPV technique was used and # indicates that the SSS technique was used. +indicates average stem diameter for multi-stemmed trees.  
5 Growth stage is represented by primary (P), secondary (S) or climax (C )

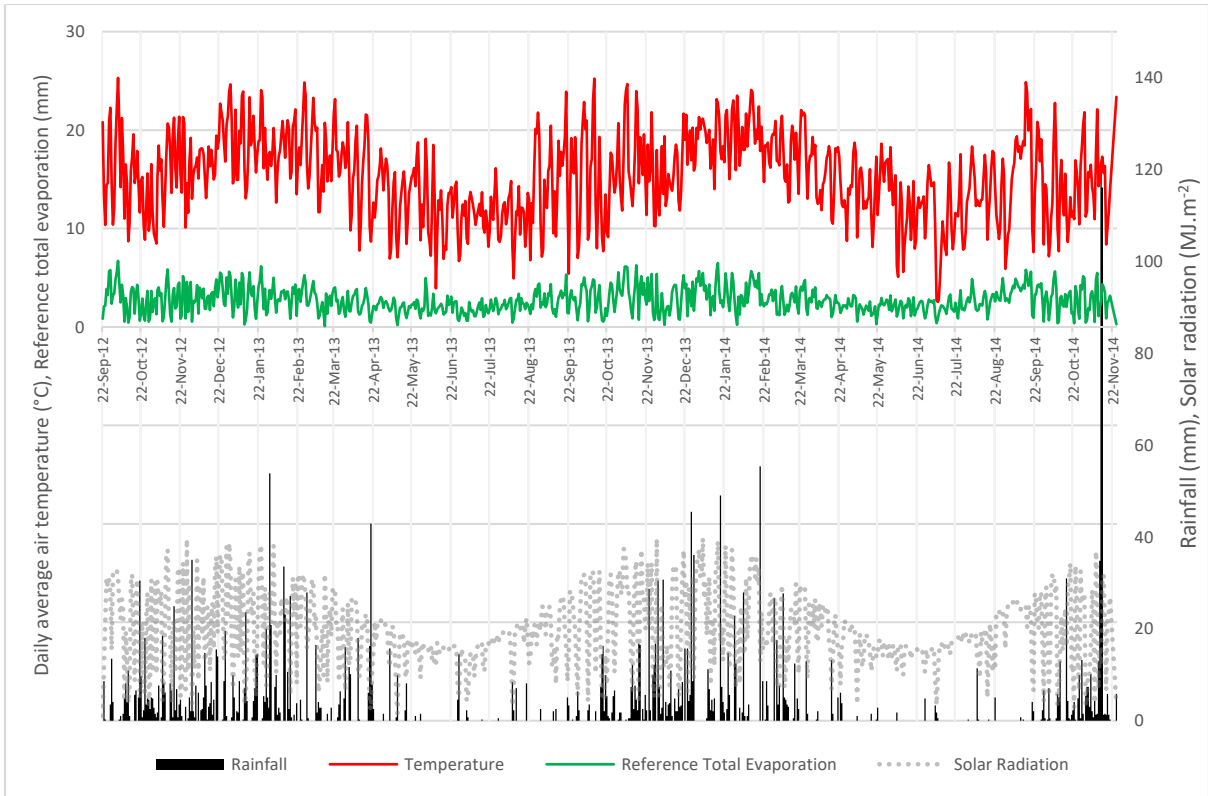

1  
2  
3  
4

Figure 2. The daily rainfall, solar radiation, average air temperatures and reference total evaporation at New Forest.

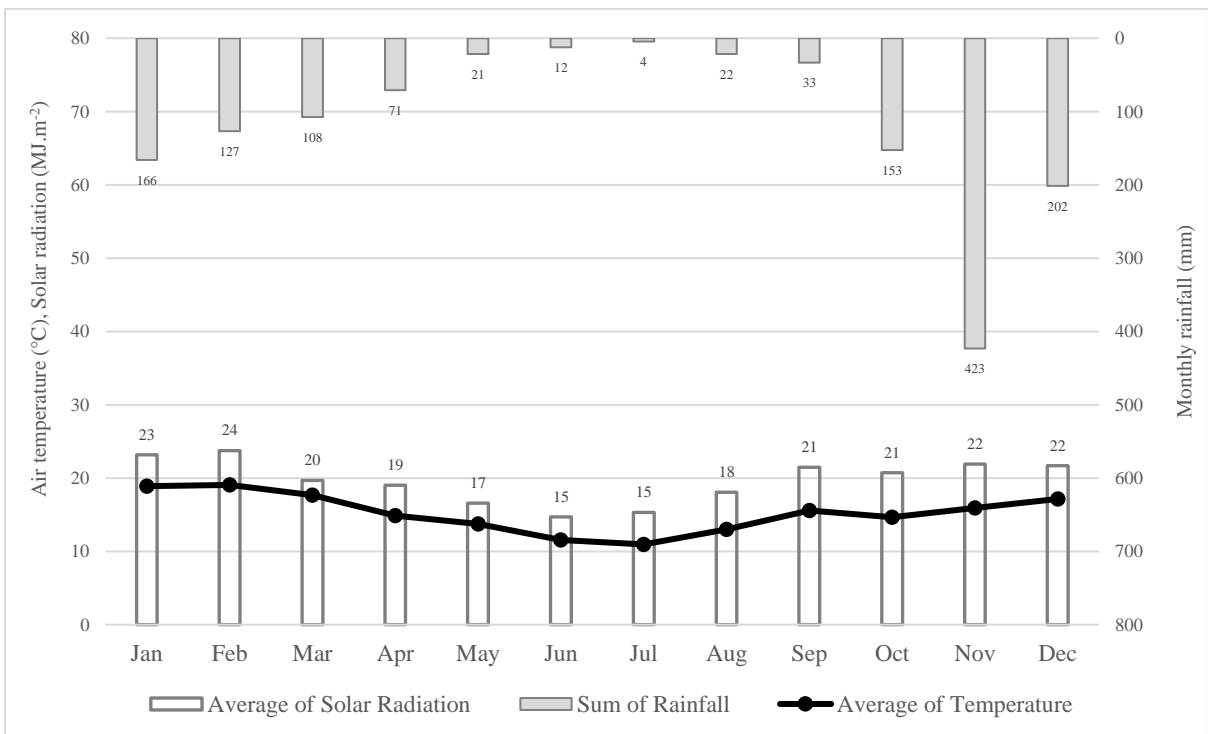

5  
6  
7  
8  
9

Figure 3. The monthly rainfall, monthly solar radiant density, and average monthly air temperatures at New Forest averaged over two years.

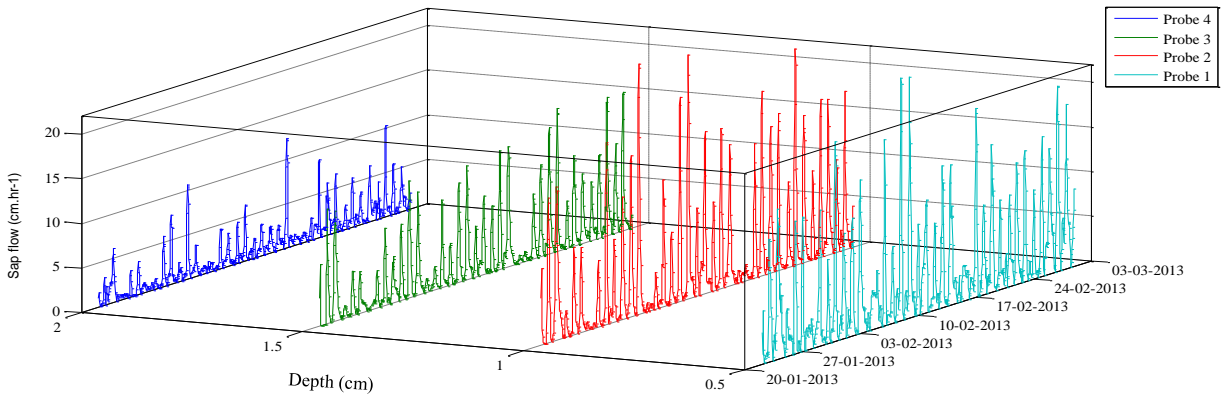

1

2

Figure 4. Hourly heat pulse velocity of a *G. buxifolia* (Ø: 114 mm) at New Forest

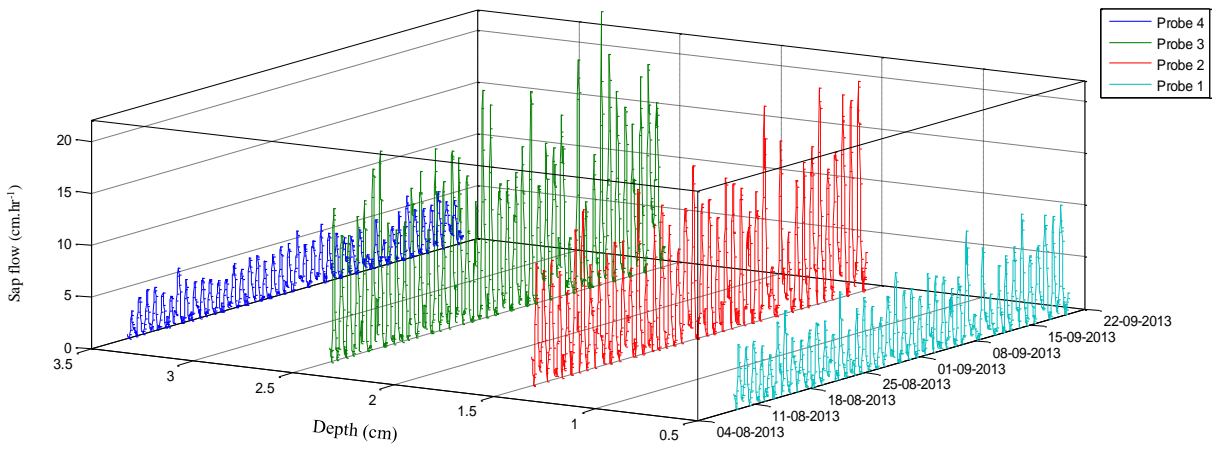

3

4

5

6

Figure 5. Hourly heat pulse velocity of an *A. mearnsii* (Ø: 131 mm) at New Forest

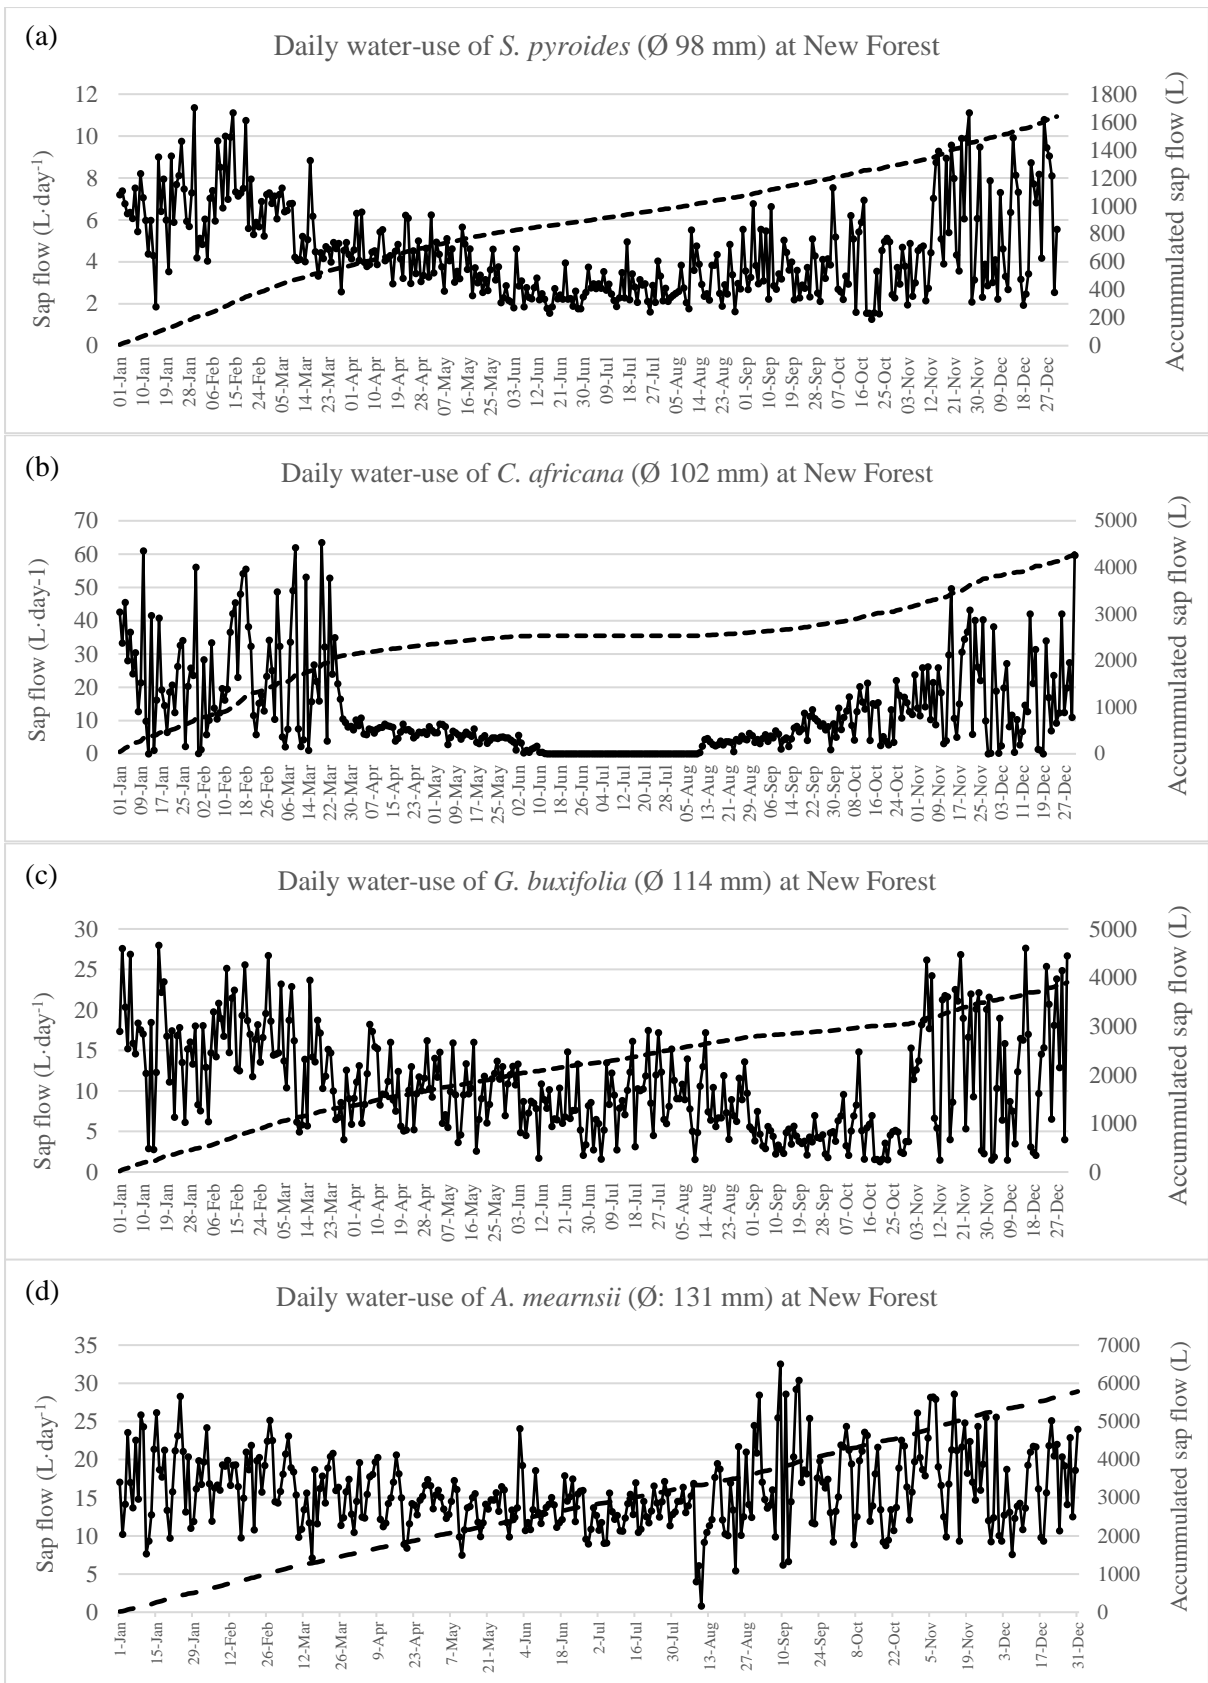

Figure 6. Sap flow (daily and accumulated) averaged over two years (2013 & 2014) from an indigenous *S. pyroides* (a), *C. africana* (b), *G. buxifolia* (c) and an introduced *A. mearnsii* (d) at New Forest.

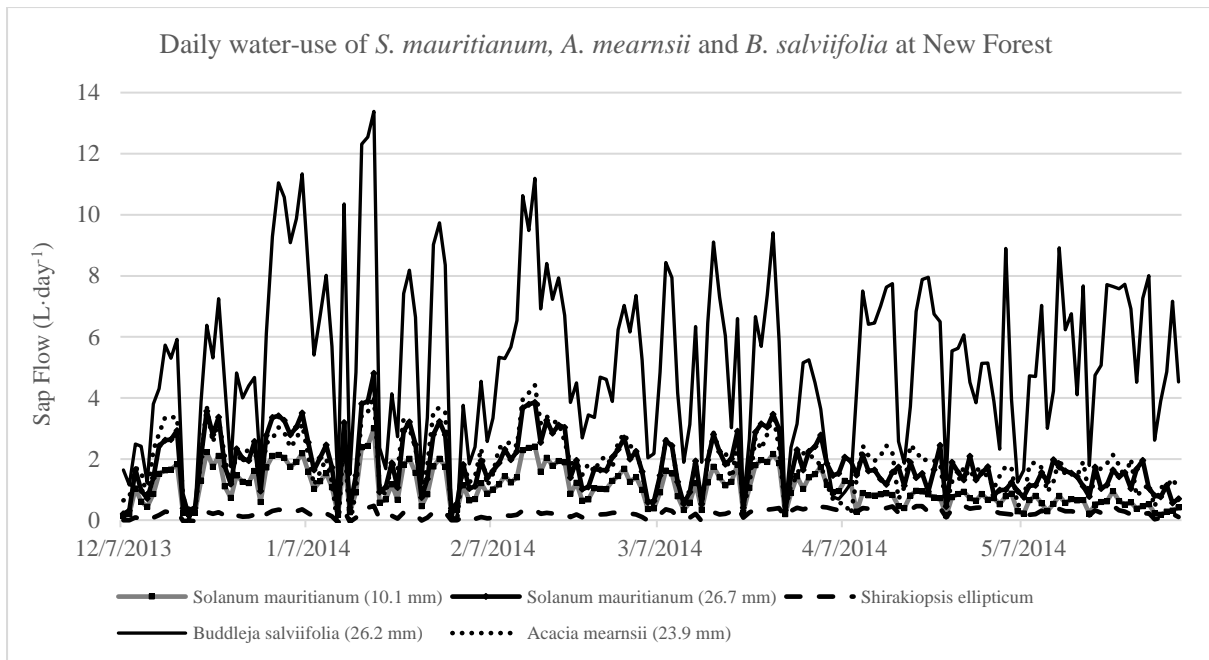

1  
2  
3  
4

Figure 7. Daily water-use for three *S. mauritianum*, a multi-stemmed *B. salviifolia* and an *A. mearnsii* using the SSS technique at New Forest from December 2013 to June 2014.

1  
2

Table 2. Sap flow (daily and accumulated) for each species measured at New Forest

| Forest Type / Location           | Species               | Diameter (mm) | Daily Average Summer Sap Flow (L.d <sup>-1</sup> ) | Daily Average Winter Sap Flow (L.d <sup>-1</sup> ) | Standard Deviation | Annual Accumulated Sap Flow (L) |
|----------------------------------|-----------------------|---------------|----------------------------------------------------|----------------------------------------------------|--------------------|---------------------------------|
| Indigenous Forest (Site 1)       | <i>S. pyroides</i>    | 98            | 9                                                  | 3.6                                                | 1.06               | 1 639                           |
|                                  | <i>G. buxifolia</i>   | 114           | 15                                                 | 3.9                                                | 0.82               | 3 901                           |
|                                  | <i>G. buxifolia</i>   | 58            | 12                                                 | 3.8                                                | 0.96               | 2 883                           |
| Introduced/Alien Forest (Site 2) | <i>A. mearnsii</i>    | 131           | 18                                                 | 15                                                 | 1.10               | 5 786                           |
|                                  | <i>A. mearnsii</i>    | 166           | 23                                                 | 17                                                 | 0.99               | 7 310                           |
| Indigenous Forest (Site 3)       | <i>C. africana</i>    | 102           | 22                                                 | 0.9                                                | 2.43               | 4 307                           |
|                                  | <i>K. africana</i>    | 50            | 10                                                 | 3.7                                                | 1.45               | 2 508                           |
|                                  | <i>L. sericea</i>     | 212           | 9                                                  | 4                                                  | 0.32               | 2 369                           |
| Introduced/Alien Forest (Site 4) | <i>E. grandis</i>     | 165           | 27                                                 | 15                                                 | 1.41               | 7 668                           |
|                                  | <i>E. grandis</i>     | 96            | 25                                                 | 14                                                 | 1.64               | 7 142                           |
| Mixed understorey (Site 5)       | <i>B. salviifolia</i> | 28            | 5.9                                                | 5.5                                                | 2.82               | 2 080                           |
|                                  | <i>S. mauritianum</i> | 25            | 0.4                                                | 0.3                                                | 0.61               | 127                             |
|                                  | <i>S. mauritianum</i> | 10            | 2.0                                                | 0.9                                                | 0.91               | 529                             |
|                                  | <i>S. mauritianum</i> | 19.1          | 2.9                                                | 1.2                                                | 0.13               | 748                             |
|                                  | <i>S. mauritianum</i> | 26.7          | 3.3                                                | 1.6                                                | 0.73               | 894                             |
|                                  | <i>A. mearnsii</i>    | 25.6          | 3.4                                                | 1.8                                                | 0.71               | 949                             |

3

1

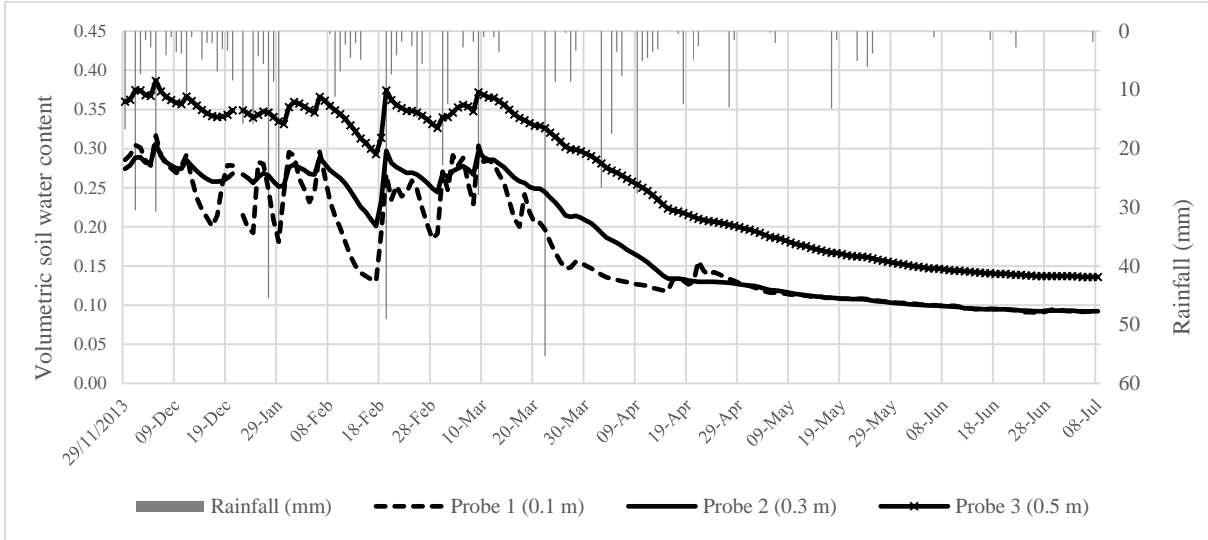

2

3

Figure 8. Hourly volumetric soil water content and the hourly rainfall at site 1 at New Forest.

4

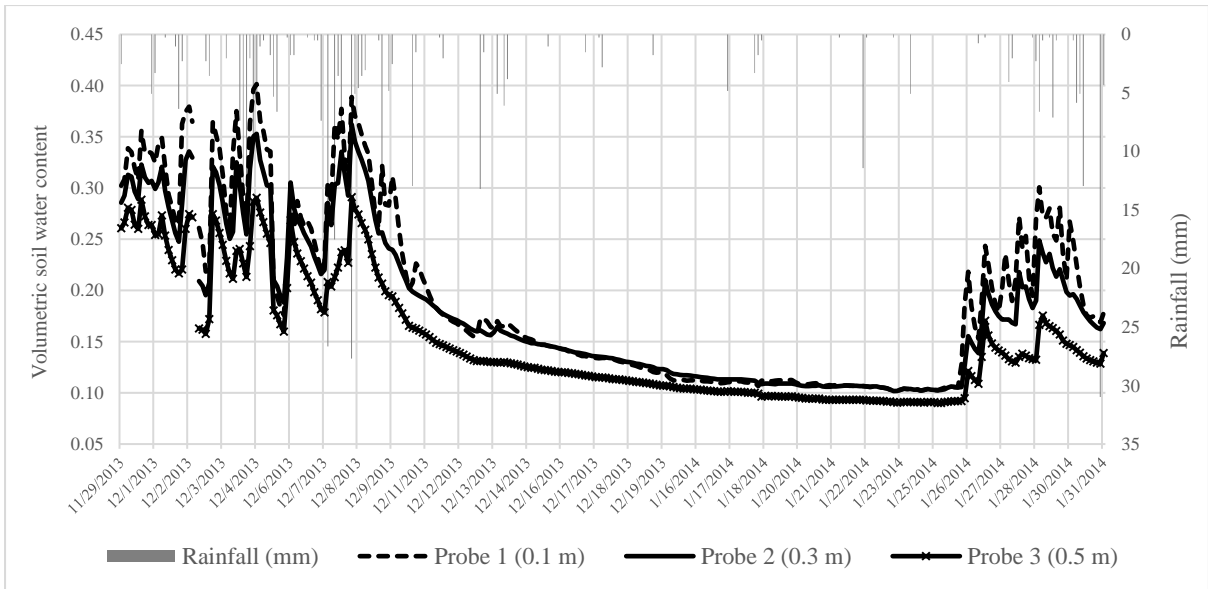

5

6

Figure 9. Hourly soil volumetric water content and the hourly rainfall at site 2 at New Forest.

7
